# Supplementary material for: Retinoic acid regulates size, pattern and alignment of tissues at the head-trunk transition
Source: Oxford University Press journal article supplement (doi:10.1242/dev.109603), 2014-11-04
Supplement: dev109603supp.pdf [file dev109603supp.pdf]

## SUPPLEMENTARY FIGURE LEGEND

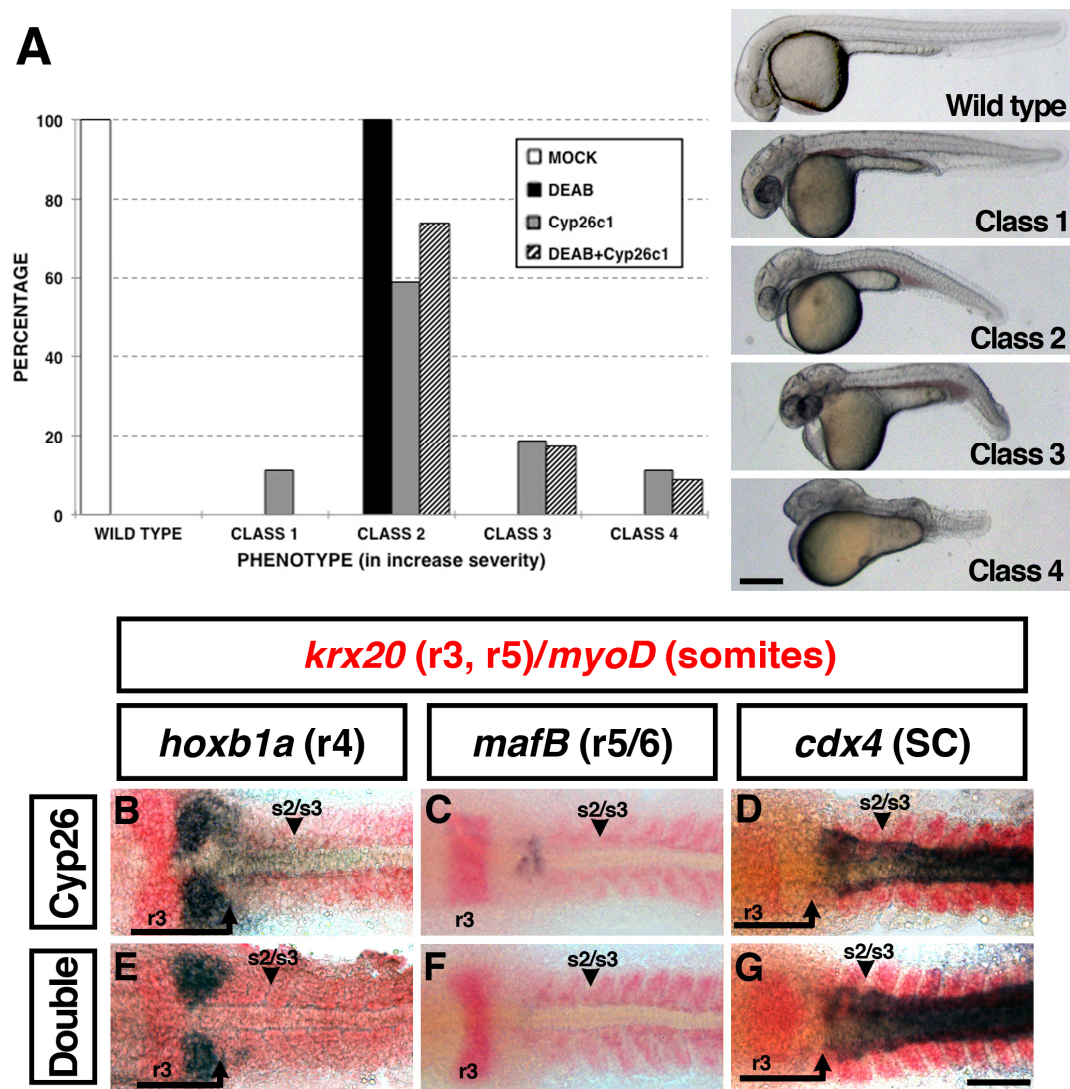

**Figure S1. Overexpression of the Retinoic Acid-degrading enzyme Cyp26c1 recapitulates defects associated with loss of Retinoic Acid synthesis.** (A) Frequency distribution of morphological defects caused by RA loss due to exposure to the RA synthesis inhibitor DEAB at 50% epiboly (black bars), overexpression of RA-degrading enzyme Cyp26c1 (gray bars) and both (hatched bars). Embryos were scored at 32 hpf using a four-class scale of increase severity. Class 1 had blood pooling. Class 2 had hindbrain size reduction, tail defects, lack of fin buds and edema. Class 3 had severe tail bending. Class 4 had a severely reduced axis and small somites. For each condition,  $n=80$  embryos from three independent trials. Cyp26c1 treatments were statistically significant from mock control (white bar), but not DEAB treatments by pairwise chi square analysis (mock versus *cyp26c1* treatment,  $\chi^2=63$ ,  $df=1$ ,  $P=0$ ; DEAB versus *cyp26c1* treatment,  $\chi^2=1.01$ ,  $df=1$ ,  $P<0.314$ ). Embryos are mounted laterally, anterior to the left. Scale bar: 250  $\mu$ m. (B-G) Expression analysis of *hoxb1a* (r4; B,E), *mafB* (r5/r6; C,F) and *cdx4*

(spinal cord; D,G) (purple) relative to r2/r3 (*krx20*, red) and somites 2/3 (*myoD*, red) boundaries, in *Cyp26c1*-overexpressing embryos that were not exposed (*Cyp26c1*; B-D) or exposed (Double; E-G) to the RA synthesis inhibitor DEAB. Similar changes were observed in DEAB-treated embryos (Fig. 1). Embryos at 12-somite stage are shown in dorsal view, anterior to the left. Arrows, distance from r2/r3 to the expression domain of the indicated gene; arrowheads, s2/s3 border. Scale bars: 50  $\mu\text{m}$ .
